# Supplementary material for: [M(OH)2]3(IO3)(SeO4)·H2O (M = Ga and In): metal iodate–selenate nonlinear optical materials with a hexagonal tungsten oxide-type topology
Source: Royal Society of Chemistry journal article supplement (doi:10.1039/d3qi00415e), 2023-01-01
Supplement: d3qi00415e1.pdf [file d3qi00415e1.pdf]

## Supporting Information

### **[M(OH)<sub>2</sub>]<sub>3</sub>(IO<sub>3</sub>)(SeO<sub>4</sub>)·H<sub>2</sub>O (M = Ga, In): metal iodate-selenate nonlinear optical materials with hexagonal tungsten oxide-type topology**

Qian-Qian Chen,<sup>a,b</sup> Chun-Li Hu,<sup>a</sup> Bing-Xuan Li<sup>a</sup> and Jiang-Gao Mao<sup>\*a,b</sup>

a. State Key Laboratory of Structural Chemistry, Fujian Institute of Research on the Structure of Matter,  
Chinese Academy of Sciences, Fuzhou, 350002, P. R. China

b. University of Chinese Academy of Sciences, Beijing 100039, P. R. China

Email: [mjg@fjirsm.ac.cn](mailto:mjg@fjirsm.ac.cn)

## Table of Contents

| Section    | Title                                                                                                                                                                                                                                  | Page |
|------------|----------------------------------------------------------------------------------------------------------------------------------------------------------------------------------------------------------------------------------------|------|
| Table S1   | Selected bond lengths (Å) and the calculated total BVS values for $[\text{M}(\text{OH})_2]_3(\text{IO}_3)(\text{SeO}_4)\cdot\text{H}_2\text{O}$ (M = Ga <b>1</b> , In <b>2</b> ).                                                      | S3   |
| Table S2   | Atomic coordinates ( $\times 10^4$ ) and equivalent isotropic displacement parameters ( $\text{Å}^2 \times 10^3$ ) for $[\text{M}(\text{OH})_2]_3(\text{IO}_3)(\text{SeO}_4)\cdot\text{H}_2\text{O}$ (M = Ga <b>1</b> , In <b>2</b> ). | S4   |
| Table S3   | The assignments of the infrared absorption peaks for $[\text{M}(\text{OH})_2]_3(\text{IO}_3)(\text{SeO}_4)\cdot\text{H}_2\text{O}$ (M = Ga, In).                                                                                       | S5   |
| Table S4   | Calculated dipole moments for $\text{GaO}_6$ , $\text{IO}_3$ , and $\text{SeO}_4$ , as well as net dipole moment for a unit cell in $[\text{Ga}(\text{OH})_2]_3(\text{IO}_3)(\text{SeO}_4)\cdot\text{H}_2\text{O}$ .                   | S5   |
| Figure S1  | Simulated and experimental powder X-ray diffraction patterns of $[\text{M}(\text{OH})_2]_3(\text{IO}_3)(\text{SeO}_4)\cdot\text{H}_2\text{O}$ (M = Ga (a), In (b)).                                                                    | S6   |
| Figure S2  | SEM images and their elemental distribution maps of $[\text{M}(\text{OH})_2]_3(\text{IO}_3)(\text{SeO}_4)\cdot\text{H}_2\text{O}$ (M = Ga (a), In (b)).                                                                                | S6   |
| Figure S3  | The coordination geometries around the $\text{Ga}^{3+}$ , $\text{I}^{5+}$ and $\text{Se}^{6+}$ ions in $[\text{Ga}(\text{OH})_2]_3(\text{IO}_3)(\text{SeO}_4)\cdot\text{H}_2\text{O}$ .                                                | S7   |
| Figure S4  | TGA and DTA curves of $[\text{M}(\text{OH})_2]_3(\text{IO}_3)(\text{SeO}_4)\cdot\text{H}_2\text{O}$ (M = Ga (a), In (b)) under the $\text{N}_2$ atmosphere.                                                                            | S7   |
| Figure S5  | The powder X-ray diffraction patterns of the residuals of $[\text{M}(\text{OH})_2]_3(\text{IO}_3)(\text{SeO}_4)\cdot\text{H}_2\text{O}$ (M = Ga (a), In (b)) after decomposition at 1000 °C.                                           | S8   |
| Figure S6  | IR spectra for $[\text{M}(\text{OH})_2]_3(\text{IO}_3)(\text{SeO}_4)\cdot\text{H}_2\text{O}$ (M = Ga (a), In (b)).                                                                                                                     | S8   |
| Figure S7  | UV-vis-IR spectra of $[\text{M}(\text{OH})_2]_3(\text{IO}_3)(\text{SeO}_4)\cdot\text{H}_2\text{O}$ (M = Ga (a), In (b)).                                                                                                               | S9   |
| Figure S8  | The calculated band structure of $[\text{M}(\text{OH})_2]_3(\text{IO}_3)(\text{SeO}_4)\cdot\text{H}_2\text{O}$ (M = Ga (a), In (b)).                                                                                                   | S9   |
| Figure S9  | The partial and total density of states for $[\text{M}(\text{OH})_2]_3(\text{IO}_3)(\text{SeO}_4)\cdot\text{H}_2\text{O}$ (M = Ga (a), In (b)).                                                                                        | S10  |
| Figure S10 | The calculated refractive indices for $[\text{M}(\text{OH})_2]_3(\text{IO}_3)(\text{SeO}_4)\cdot\text{H}_2\text{O}$ (M = Ga (a), In (b)).                                                                                              | S10  |

**Table S1.** Selected bond lengths (Å) and the calculated total BVS values for [M(OH)<sub>2</sub>]<sub>3</sub>(IO<sub>3</sub>)(SeO<sub>4</sub>)·H<sub>2</sub>O (M = Ga **1**, In **2**).

| <b>1</b>        |           | <b>2</b>        |           |
|-----------------|-----------|-----------------|-----------|
| Ga(1)-O(1)      | 1.944(2)  | In(1)-O(1)      | 2.121(3)  |
| Ga(1)-O(1)#1    | 1.944(2)  | In(1)-O(1)#1    | 2.121(3)  |
| Ga(1)-O(2)      | 1.922(2)  | In(1)-O(2)      | 2.094(3)  |
| Ga(1)-O(2)#4    | 1.922(2)  | In(1)-O(2)#4    | 2.094(3)  |
| Ga(1)-O(3)      | 2.000(7)  | In(1)-O(3)      | 2.162(8)  |
| Ga(1)-O(4)      | 2.067(7)  | In(1)-O(4)      | 2.205(8)  |
| <b>BVS (Ga)</b> | 3.20      | <b>BVS (In)</b> | 3.23      |
| I(1)-O(3)       | 1.807(6)  | I(1)-O(3)       | 1.797(8)  |
| I(1)-O(3)#1     | 1.807(6)  | I(1)-O(3)#1     | 1.797(8)  |
| I(1)-O(3)#2     | 1.807(6)  | I(1)-O(3)#2     | 1.797(8)  |
| <b>BVS (I)</b>  | 5.10      | <b>BVS (I)</b>  | 5.24      |
| Se(1)-O(4)      | 1.646(7)  | Se(1)-O(4)      | 1.635(9)  |
| Se(1)-O(4)#3    | 1.646(7)  | Se(1)-O(4)#3    | 1.635(9)  |
| Se(1)-O(4)#4    | 1.646(7)  | Se(1)-O(4)#4    | 1.635(9)  |
| Se(1)-O(5)      | 1.616(11) | Se(1)-O(5)      | 1.606(15) |
| <b>BVS (Se)</b> | 6.00      | <b>BVS (Se)</b> | 6.17      |
| O(1)-H(1)       | 0.7920    | O(1)-H(1)       | 0.8353    |
| O(2)-H(2)       | 0.8196    | O(2)-H(2)       | 0.8565    |

Symmetry transformations used to generate equivalent atoms: #1 -x+y, -x, z; #2 -y, x-y, z; #3 -x+y, -x+1, z; #4 -y+1, x-y+1, z.

**Table S2.** Atomic coordinates ( $\times 10^4$ ) and equivalent isotropic displacement parameters ( $\text{\AA}^2 \times 10^3$ ) for  $[\text{M}(\text{OH})_2]_3(\text{IO}_3)(\text{SeO}_4)\cdot\text{H}_2\text{O}$  (M = Ga **1**, In **2**).

| <b>1</b>    |           |            |            |              |
|-------------|-----------|------------|------------|--------------|
| <b>Atom</b> | <b>x</b>  | <b>y</b>   | <b>z</b>   | <b>U(eq)</b> |
| Ga(1)       | 1673.0(9) | 3346.0(17) | 5086.1(10) | 8.1(2)       |
| I(1)        | 0         | 0          | 2785.4(8)  | 9.6(2)       |
| Se(1)       | 3333.33   | 6666.67    | 7214.3(11) | 8.0(3)       |
| O(1)        | -1245(5)  | 1245(5)    | 5490(5)    | 10.8(12)     |
| O(2)        | 757(10)   | 5379(5)    | 4779(6)    | 11.5(13)     |
| O(3)        | 1283(5)   | 2566(10)   | 3476(6)    | 13.3(13)     |
| O(4)        | 2097(5)   | 4194(10)   | 6744(6)    | 12.6(13)     |
| O(5)        | 3333.33   | 6666.67    | 8556(9)    | 15(3)        |
| O(1W)       | -3333.33  | 3333.33    | 6861(15)   | 47(5)        |
| <b>2</b>    |           |            |            |              |
| <b>Atom</b> | <b>x</b>  | <b>y</b>   | <b>z</b>   | <b>U(eq)</b> |
| In(1)       | 1675.9(6) | 3351.7(12) | 5118.0(9)  | 10.33(19)    |
| I(1)        | 0         | 0          | 2758.4(9)  | 14.9(3)      |
| Se(1)       | 3333.33   | 6666.67    | 7299.9(13) | 12.3(4)      |
| O(1)        | -1243(6)  | 1243(6)    | 5635(6)    | 13.7(17)     |
| O(2)        | 714(12)   | 5357(6)    | 4711(6)    | 17.7(18)     |
| O(3)        | 1189(6)   | 2379(12)   | 3431(7)    | 21.1(19)     |
| O(4)        | 2194(6)   | 4388(13)   | 6831(6)    | 22(2)        |
| O(5)        | 3333.33   | 6666.67    | 8615(12)   | 20(4)        |
| O(1W)       | -3333.33  | 3333.33    | 6940(20)   | 89(10)       |

**Table S3.** The assignments of the infrared absorption peaks for  $[M(OH)_2]_3(IO_3)(SeO_4) \cdot H_2O$  (M = Ga, In).

| IR peak ( $cm^{-1}$ ) | Assignment                                                              |
|-----------------------|-------------------------------------------------------------------------|
| 3700-3200             | O-H stretching bands                                                    |
| 1637                  | H-O-H bending mode                                                      |
| 1130-950              | $\nu_3$ asymmetric stretching of Se-O                                   |
| 950-823               | $\nu_3$ asymmetric stretching of I-O                                    |
| 823-670               | $\nu_1$ symmetric stretching of I-O                                     |
| 630-400               | $\nu_4$ asymmetric bending of Se-O and $\nu_2$ symmetric bending of I-O |

**Table S4.** Calculated dipole moments for  $GaO_6$ ,  $IO_3$ , and  $SeO_4$ , as well as net dipole moment for a unit cell in  $[Ga(OH)_2]_3(IO_3)(SeO_4) \cdot H_2O$ .

| $[Ga(OH)_2]_3(IO_3)(SeO_4) \cdot H_2O$ (Z = 2) |                            |                        |                            |                     |
|------------------------------------------------|----------------------------|------------------------|----------------------------|---------------------|
| Polar unit                                     | Dipole moment (D = Debyes) |                        |                            |                     |
|                                                | total magnitude            | x-component            | y-component                | z-component         |
| $Ga(1)O_6$                                     | 0.827                      | $(\pm 0.004) \times 3$ | $(\pm 0.079) \times 3$     | $(0.823) \times 6$  |
| $I(1)O_3$                                      | 13.891                     | $0 \times 2$           | $\pm 8.824 \times 10^{-6}$ | $13.891 \times 2$   |
| $Se(1)O_4$                                     | 0.162                      | $0 \times 2$           | $\pm 8.994 \times 10^{-5}$ | $(-0.162) \times 2$ |
| Net dipole moment (a unit cell)                | 32.396                     | 0                      | 0                          | 32.396              |

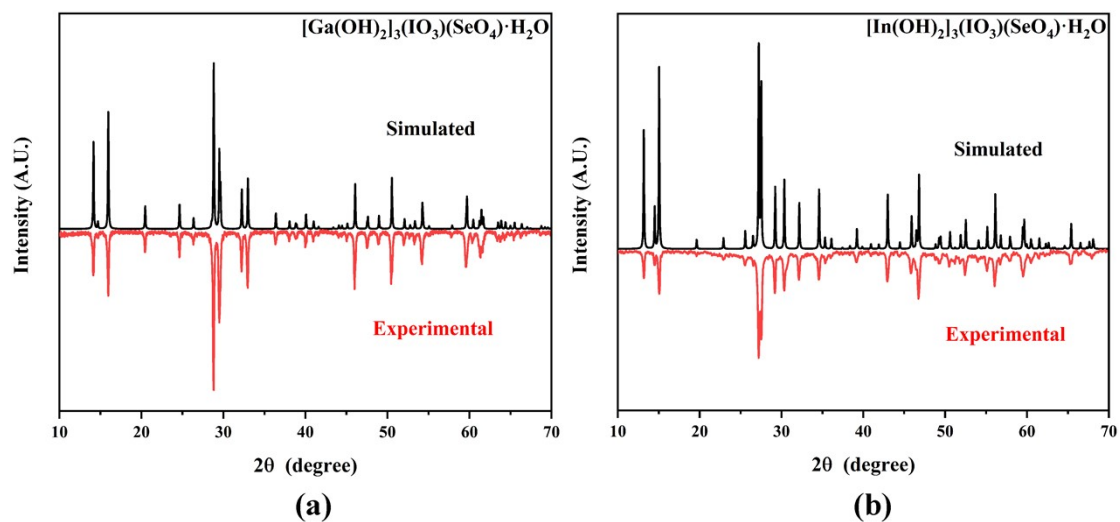

**Figure S1.** Simulated and experimental powder X-ray diffraction patterns of  $[\text{M}(\text{OH})_2]_3(\text{IO}_3)(\text{SeO}_4)\cdot\text{H}_2\text{O}$  (M = Ga (a), In (b)).

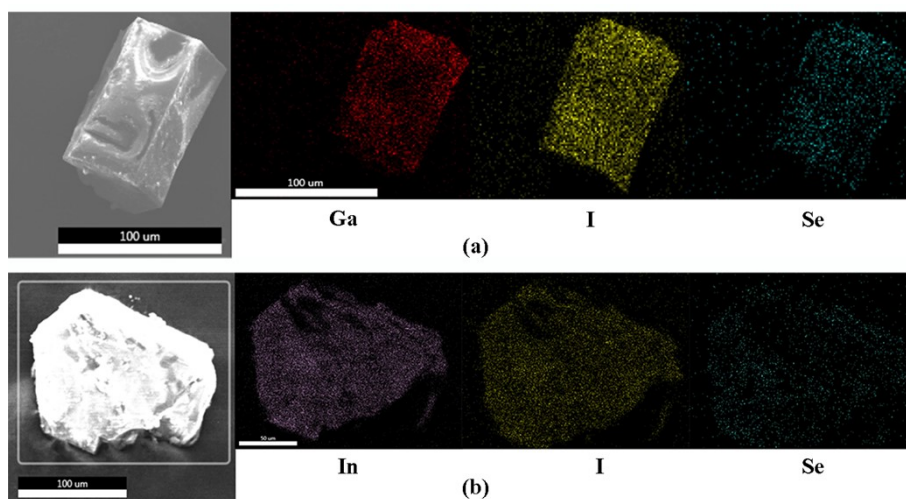

**Figure S2.** SEM images and their elemental distribution maps of  $[\text{M}(\text{OH})_2]_3(\text{IO}_3)(\text{SeO}_4)\cdot\text{H}_2\text{O}$  (M = Ga (a), In (b)).

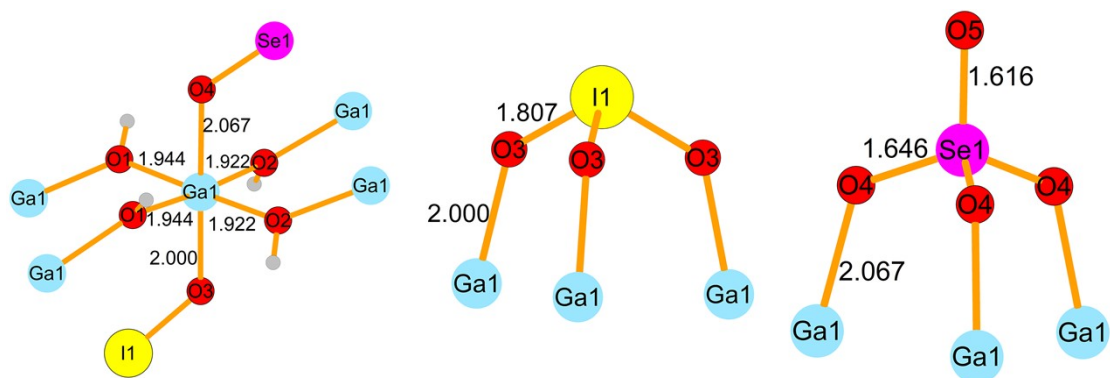

**Figure S3.** The coordination geometries around the  $\text{Ga}^{3+}$ ,  $\text{I}^{5+}$  and  $\text{Se}^{6+}$  ions in  $[\text{Ga}(\text{OH})_2]_3(\text{IO}_3)(\text{SeO}_4)\cdot\text{H}_2\text{O}$ .

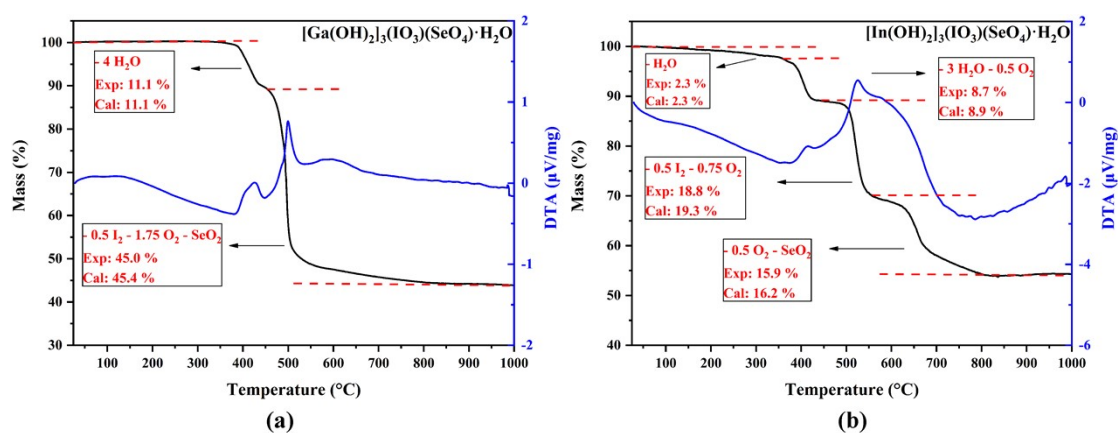

**Figure S4.** TGA and DTA curves of  $[\text{M}(\text{OH})_2]_3(\text{IO}_3)(\text{SeO}_4)\cdot\text{H}_2\text{O}$  ( $\text{M} = \text{Ga}$  (a),  $\text{In}$  (b)) under the  $\text{N}_2$  atmosphere.

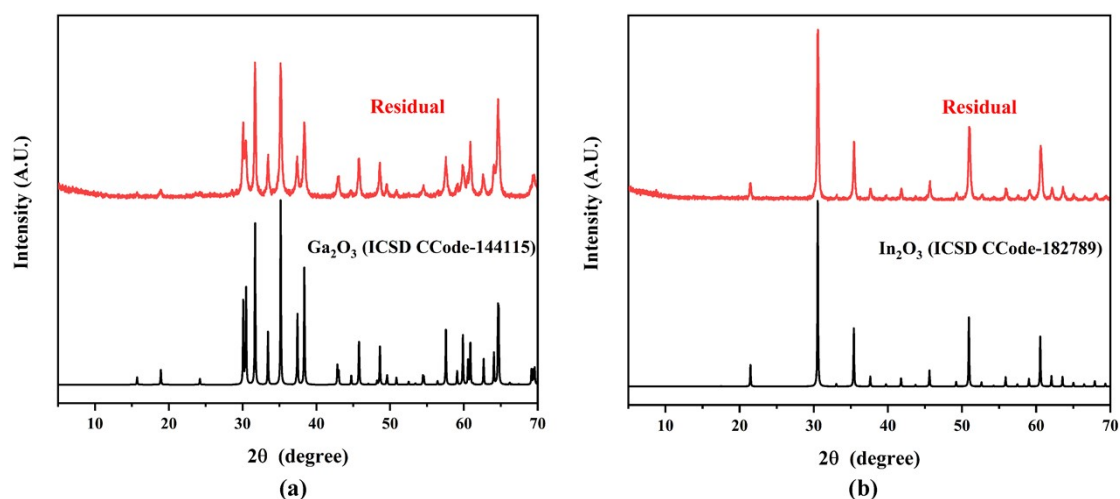

**Figure S5.** The powder X-ray diffraction patterns of the residuals of  $[M(OH)_2]_3(IO_3)(SeO_4) \cdot H_2O$  ( $M = Ga$  (a),  $In$  (b)) after decomposition at  $1000\text{ }^\circ\text{C}$ .

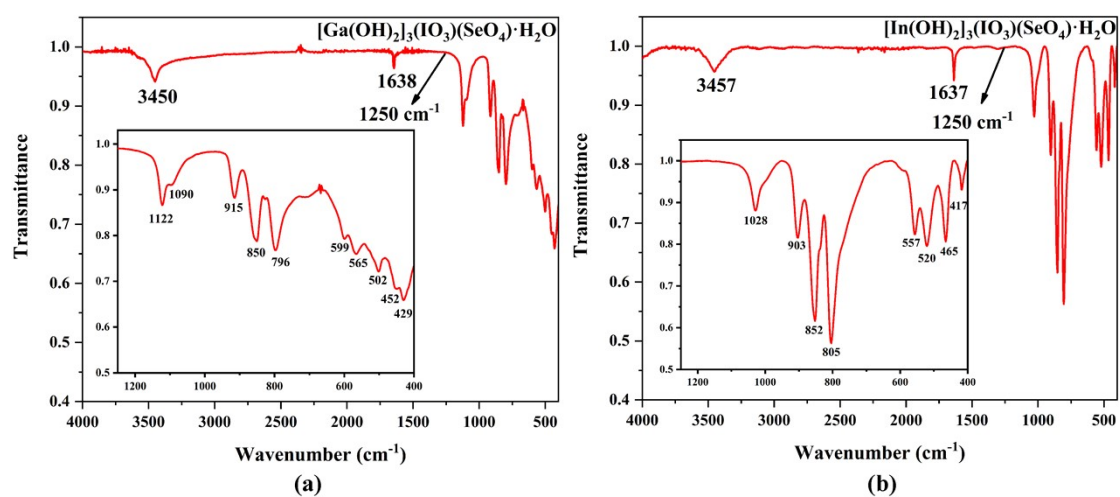

**Figure S6.** IR spectra for  $[M(OH)_2]_3(IO_3)(SeO_4) \cdot H_2O$  ( $M = Ga$  (a),  $In$  (b)).



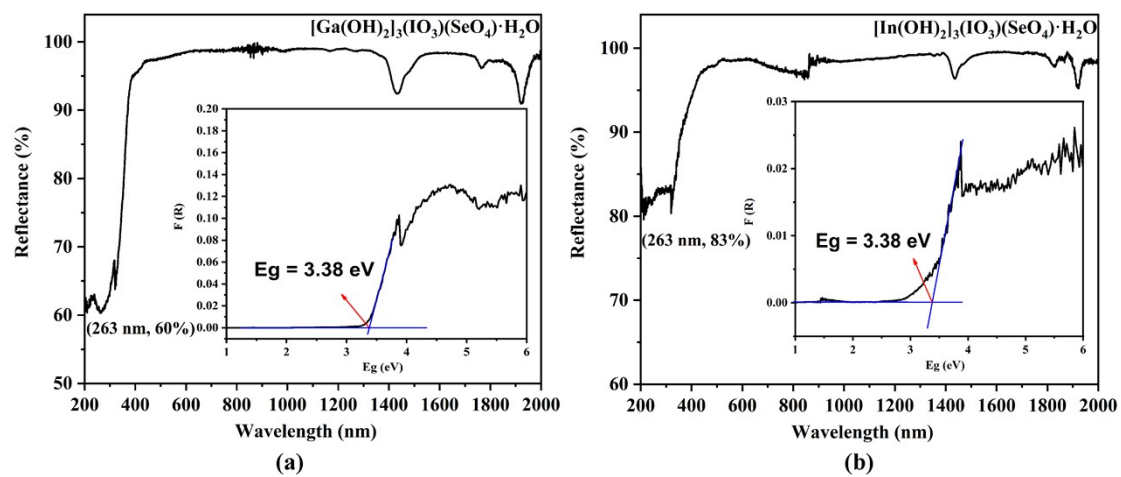

**Figure S7.** UV-vis-IR spectra of  $[M(OH)_2]_3(IO_3)(SeO_4) \cdot H_2O$  ( $M = Ga$  (a),  $In$  (b)).

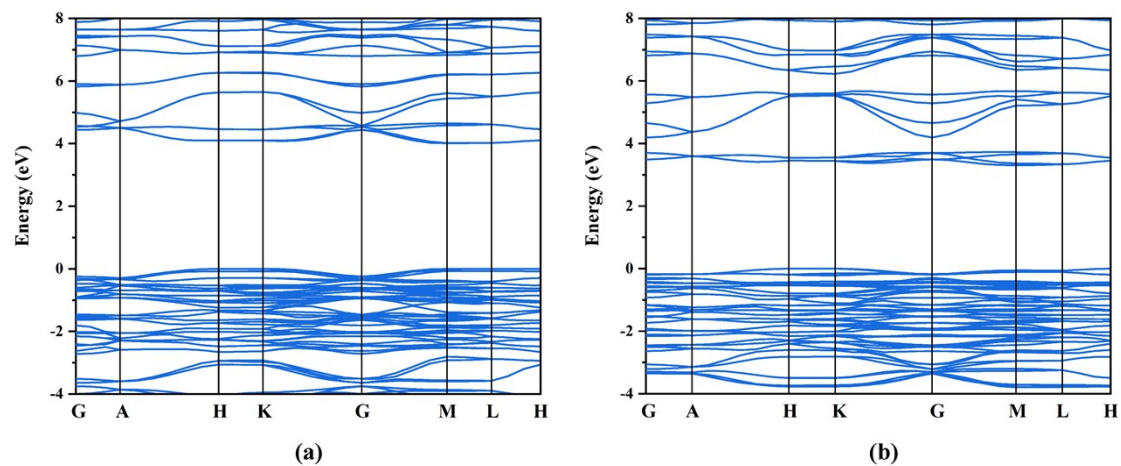

**Figure S8.** The calculated band structure of  $[M(OH)_2]_3(IO_3)(SeO_4) \cdot H_2O$  ( $M = Ga$  (a),  $In$  (b)).

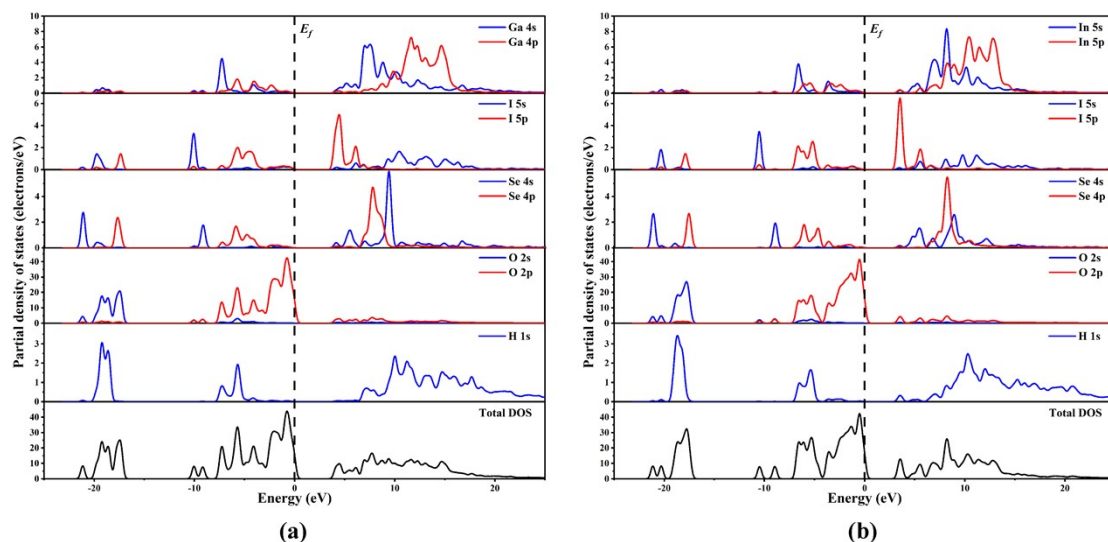

**Figure S9.** The partial and total density of states for  $[M(OH)_2]_3(IO_3)(SeO_4) \cdot H_2O$  ( $M =$  Ga (a), In (b)).

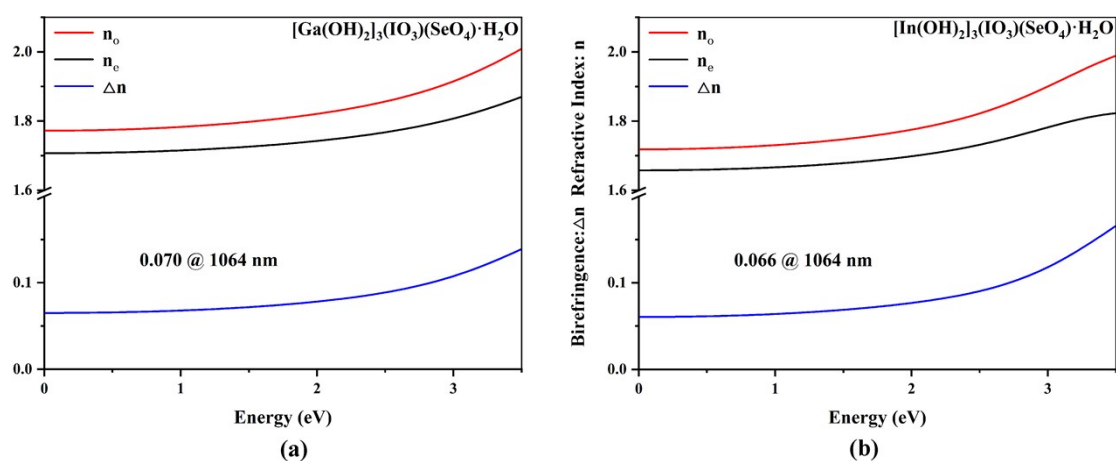

**Figure S10.** The calculated refractive indices for  $[M(OH)_2]_3(IO_3)(SeO_4) \cdot H_2O$  ( $M =$  Ga (a), In (b)).
